# Supplementary material for: Comparison of Agar Dilution to Broth Microdilution for Testing In Vitro Activity of Cefiderocol against Gram-Negative Bacilli
Source: PubMed Central journal article supplement (PMC7771473; doi:10.1128/jcm.00966-20), 2020-12-17
Supplement: JCM.00966-20-s0001.pdf [file JCM.00966-20-s0001.pdf]

Table S1. Minimum inhibitory concentration (MIC) of cefiderocol for 610 Gram-negative bacilli determined by broth microdilution using iron-depleted cation-adjusted Muller Hinton broth (ID-BMD), broth microdilution using standard cation-adjusted Muller Hinton broth (BMD), and agar dilution (AD).

| Species or complex      | Isolate number | Resistance gene(s) detected                    | MIC (µg/mL) |       |       |
|-------------------------|----------------|------------------------------------------------|-------------|-------|-------|
|                         |                |                                                | ID-BMD      | BMD   | AD    |
| <i>Escherichia coli</i> | IDRL-10366     | <i>blaKPC</i>                                  | 1           | 2     | 2     |
| <i>E. coli</i>          | IDRL-10402     | <i>blaKPC</i>                                  | 2           | 4     | 2     |
| <i>E. coli</i>          | IDRL-10407     | <i>blaNDM</i>                                  | 2           | 8     | 4     |
| <i>E. coli</i>          | IDRL-10414     | <i>blaTEM-12</i>                               | 0.12        | 0.12  | 0.12  |
| <i>E. coli</i>          | IDRL-10418     | <i>blaCTX-M-15, blaTEM-1</i>                   | 0.12        | 0.25  | 0.25  |
| <i>E. coli</i>          | IDRL-10419     | <i>blaCTX-M-15, blaOXA-1</i>                   | 0.12        | 0.06  | 0.06  |
| <i>E. coli</i>          | IDRL-10424     | <i>blaCMY-2</i>                                | 0.25        | 0.5   | 0.5   |
| <i>E. coli</i>          | IDRL-10430     | <i>blaCMY-2</i>                                | 1           | 1     | 1     |
| <i>E. coli</i>          | IDRL-10431     | <i>blaFOX-5</i>                                | 0.06        | 0.06  | 0.06  |
| <i>E. coli</i>          | IDRL-10432     | <i>blaCTX-M-14, blaTEM-1</i>                   | 0.5         | 0.06  | 0.12  |
| <i>E. coli</i>          | IDRL-10433     | <i>blaCTX-M-15, blaTEM-1</i>                   | 1           | 4     | 2     |
| <i>E. coli</i>          | IDRL-10435     | <i>blaCMY-2</i>                                | 0.5         | 0.25  | 0.25  |
| <i>E. coli</i>          | IDRL-10438     | <i>blaCTX-M-14, blaTEM-1</i>                   | 0.5         | 0.25  | 0.5   |
| <i>E. coli</i>          | IDRL-10439     | <i>blaCTX-M-15, blaOXA-1</i>                   | 4           | 8     | 4     |
| <i>E. coli</i>          | IDRL-10440     | <i>blaCMY-2</i>                                | 0.12        | 0.06  | 0.06  |
| <i>E. coli</i>          | IDRL-10452     | <i>blaNDM-1</i>                                | 8           | >64   | 32    |
| <i>E. coli</i>          | IDRL-10455     | <i>blaNDM-1</i>                                | 4           | 16    | 8     |
| <i>E. coli</i>          | IDRL-10456     | <i>blaNDM-1</i>                                | 4           | 32    | 16    |
| <i>E. coli</i>          | IDRL-10458     | <i>blaNDM-1</i>                                | 4           | 16    | 8     |
| <i>E. coli</i>          | IDRL-10466     | <i>blaNDM-7</i>                                | 4           | 32    | 16    |
| <i>E. coli</i>          | IDRL-10467     | <i>blaNDM-1</i>                                | 4           | 32    | 16    |
| <i>E. coli</i>          | IDRL-10469     | <i>blaOXA-48</i>                               | 0.12        | 0.06  | 0.12  |
| <i>E. coli</i>          | IDRL-10483     | <i>blaIMP</i>                                  | 0.06        | 0.06  | 0.06  |
| <i>E. coli</i>          | IDRL-10503     | <i>blaKPC</i>                                  | 2           | 4     | 2     |
| <i>E. coli</i>          | IDRL-10516     | <i>blaNDM</i>                                  | 4           | 8     | 4     |
| <i>E. coli</i>          | IDRL-10525     | <i>blaKPC</i>                                  | 4           | 8     | 4     |
| <i>E. coli</i>          | IDRL-10553     | <i>blaKPC</i>                                  | 1           | 1     | 1     |
| <i>E. coli</i>          | IDRL-10590     | <i>blaCMY-8</i>                                | 2           | 4     | 2     |
| <i>E. coli</i>          | IDRL-10591     | <i>blaCTX-M-15</i>                             | 0.12        | 0.12  | 0.12  |
| <i>E. coli</i>          | IDRL-10592     | <i>blaCTX-M-128</i>                            | 1           | 1     | 1     |
| <i>E. coli</i>          | IDRL-10593     | <i>blaCTX-M-15</i>                             | 2           | 2     | 2     |
| <i>E. coli</i>          | IDRL-10594     | <i>blaTEM-43</i>                               | >64         | >64   | 32    |
| <i>E. coli</i>          | IDRL-10595     | <i>blaTEM-12</i>                               | 2           | 4     | 4     |
| <i>E. coli</i>          | IDRL-10596     | <i>blaCTX-M-9, blaTEM-1</i>                    | 0.12        | 0.12  | 0.12  |
| <i>E. coli</i>          | IDRL-10597     | <i>blaTEM-1, blaSHV-1 (non-ESBL)</i>           | 1           | 2     | 2     |
| <i>E. coli</i>          | IDRL-10598     | <i>blaSHV, blaCTX-M-9</i>                      | 2           | 8     | 4     |
| <i>E. coli</i>          | IDRL-10603     | <i>blaCMY-2</i>                                | 0.03        | 0.06  | 0.03  |
| <i>E. coli</i>          | IDRL-10604     | <i>blaCMY-2</i>                                | 0.5         | 0.5   | 0.5   |
| <i>E. coli</i>          | IDRL-10605     | <i>blaCMY-2, blaTEM-1</i>                      | 0.5         | 1     | 1     |
| <i>E. coli</i>          | IDRL-10606     | <i>blaCMY-2, blaTEM-1</i>                      | 0.06        | 0.12  | 0.12  |
| <i>E. coli</i>          | IDRL-10607     | <i>blaCMY-2, blaTEM-1</i>                      | 2           | 1     | 1     |
| <i>E. coli</i>          | IDRL-10608     | <i>blaCTX-M-28</i>                             | 0.06        | 0.12  | 0.12  |
| <i>E. coli</i>          | IDRL-10633     | <i>blaCTX-M-9, blaTEM-1</i>                    | 0.03        | 0.12  | 0.12  |
| <i>E. coli</i>          | IDRL-10635     | <i>blaCMY-2</i>                                | 0.5         | 0.5   | 0.5   |
| <i>E. coli</i>          | IDRL-10637     | <i>blaCTX-M-15, blaTEM-1/84/103/104/122</i>    | 0.12        | 0.06  | 0.06  |
| <i>E. coli</i>          | IDRL-10638     | <i>blaCTX-M-24, blaTEM-1/84/103/104/122</i>    | 0.03        | 0.008 | 0.008 |
| <i>E. coli</i>          | IDRL-10640     | <i>blaSHV-1, blaCMY-2</i>                      | 1           | 0.5   | 1     |
| <i>E. coli</i>          | IDRL-10641     | <i>blaCMY-2</i>                                | 2           | 8     | 4     |
| <i>E. coli</i>          | IDRL-10642     | <i>blaCMY-2</i>                                | 1           | 1     | 1     |
| <i>E. coli</i>          | IDRL-10643     | <i>blaCTX-M1-LIKE, blaCMY-2</i>                | 2           | 2     | 2     |
| <i>E. coli</i>          | IDRL-10644     | <i>blaCTX-M1-LIKE, blaCMY-2</i>                | 2           | 8     | 4     |
| <i>E. coli</i>          | IDRL-10645     | <i>blaCTX-M-1, blaTEM-1</i>                    | 0.25        | 0.25  | 0.25  |
| <i>E. coli</i>          | IDRL-10646     | <i>blaCMY-2</i>                                | 0.5         | 0.5   | 0.5   |
| <i>E. coli</i>          | IDRL-10650     | <i>blaCTX-M-28</i>                             | 0.5         | 0.5   | 0.5   |
| <i>E. coli</i>          | IDRL-10651     | <i>blaTEM-1, blaSHV, blaCMY-2</i>              | 0.5         | 0.5   | 0.5   |
| <i>E. coli</i>          | IDRL-10653     | <i>blaCMY-2</i>                                | 0.5         | 0.5   | 0.5   |
| <i>E. coli</i>          | IDRL-10655     | <i>blaTEM-1, blaSHV, blaCTX-M-24, blaCMY-2</i> | 0.25        | 0.5   | 0.5   |
| <i>E. coli</i>          | IDRL-10657     | <i>blaCTX-M-1-LIKE, blaTEM-1</i>               | 2           | 8     | 4     |
| <i>E. coli</i>          | IDRL-10659     | <i>blaCMY-2, blaTEM-1</i>                      | 0.12        | 0.06  | 0.06  |
| <i>E. coli</i>          | IDRL-10668     | <i>blaTEM, blaSHV</i>                          | 2           | 16    | 8     |
| <i>E. coli</i>          | IDRL-10669     | <i>blaTEM-3</i>                                | 0.12        | 0.12  | 0.12  |
| <i>E. coli</i>          | IDRL-10683     | <i>blaCTX-M-15</i>                             | 2           | 2     | 2     |
| <i>E. coli</i>          | IDRL-10684     | <i>blaCTX-M-15</i>                             | 2           | 16    | 8     |
| <i>E. coli</i>          | IDRL-10685     | <i>blaCTX-M-15</i>                             | 0.06        | 0.25  | 0.25  |
| <i>E. coli</i>          | IDRL-10686     | <i>blaCTX-M-15</i>                             | 0.5         | 1     | 1     |
| <i>E. coli</i>          | IDRL-10687     | <i>blaCTX-M-3</i>                              | 0.5         | 0.5   | 0.5   |
| <i>E. coli</i>          | IDRL-10688     | <i>blaCTX-M-3</i>                              | 0.25        | 0.25  | 0.25  |
| <i>E. coli</i>          | IDRL-10689     | <i>blaCTX-M-3</i>                              | 0.25        | 0.25  | 0.25  |
| <i>E. coli</i>          | IDRL-10705     | <i>blaCTX-M-15</i>                             | 0.03        | 0.03  | 0.015 |
| <i>E. coli</i>          | IDRL-10706     | <i>blaCTX-M-15</i>                             | 1           | 2     | 2     |
| <i>E. coli</i>          | IDRL-10707     | <i>blaCTX-M-15</i>                             | 2           | 4     | 4     |
| <i>E. coli</i>          | IDRL-10708     | <i>blaCTX-M-15</i>                             | 4           | 16    | 8     |
| <i>E. coli</i>          | IDRL-10709     | <i>blaCTX-M-15</i>                             | 2           | 4     | 4     |
| <i>E. coli</i>          | IDRL-10710     | <i>blaCTX-M-15</i>                             | 0.5         | 0.25  | 0.5   |
| <i>E. coli</i>          | IDRL-10711     | <i>blaCTX-M-15</i>                             | 2           | 2     | 2     |
| <i>E. coli</i>          | IDRL-10712     | <i>blaCTX-M-15</i>                             | 0.5         | 0.5   | 1     |
| <i>E. coli</i>          | IDRL-10713     | <i>blaCTX-M-15</i>                             | 1           | 1     | 1     |
| <i>E. coli</i>          | IDRL-10714     | <i>blaCTX-M-15</i>                             | 1           | 0.5   | 1     |
| <i>E. coli</i>          | IDRL-10715     | <i>blaCTX-M-15</i>                             | 2           | 2     | 2     |
| <i>E. coli</i>          | IDRL-10716     | <i>blaCTX-M-15</i>                             | 2           | 2     | 2     |
| <i>E. coli</i>          | IDRL-10719     | <i>blaCTX-M-15</i>                             | 0.25        | 0.25  | 0.25  |
| <i>E. coli</i>          | IDRL-10720     | <i>blaCTX-M-15</i>                             | 0.12        | 0.12  | 0.12  |
| <i>E. coli</i>          | IDRL-10721     | <i>blaCTX-M-15</i>                             | 2           | 4     | 4     |
| <i>E. coli</i>          | IDRL-10722     | <i>blaCTX-M-15</i>                             | 0.5         | 0.25  | 0.5   |
| <i>E. coli</i>          | IDRL-10723     | <i>blaCTX-M-15</i>                             | 0.5         | 0.12  | 0.25  |
| <i>E. coli</i>          | IDRL-10724     | <i>blaCTX-M-15</i>                             | 0.5         | 1     | 1     |
| <i>E. coli</i>          | IDRL-10725     | -                                              | 0.03        | 0.06  | 0.06  |
| <i>E. coli</i>          | IDRL-10726     | <i>blaCTX-M-15</i>                             | 0.5         | 0.12  | 0.25  |
| <i>E. coli</i>          | IDRL-10727     | <i>blaCTX-M-15</i>                             | 2           | 1     | 1     |
| <i>E. coli</i>          | IDRL-10728     | <i>blaCTX-M-15</i>                             | 1           | 1     | 1     |
| <i>E. coli</i>          | IDRL-12149     | <i>blaOXA-48</i>                               | 1           | 2     | 2     |
| <i>E. coli</i>          | IDRL-12157     | <i>blaOXA-48</i>                               | 4           | 8     | 8     |
| <i>E. coli</i>          | IDRL-12158     | <i>blaNDM</i>                                  | >64         | >64   | >64   |
| <i>E. coli</i>          | IDRL-12159     | <i>blaNDM</i>                                  | 8           | >64   | 32    |

|                              |            |                                       |      |      |      |
|------------------------------|------------|---------------------------------------|------|------|------|
| <i>E. coli</i>               | IDRL-12161 | <i>bla</i> NDM                        | 4    | 16   | 8    |
| <i>E. coli</i>               | IDRL-12162 | <i>bla</i> NDM                        | 4    | 8    | 8    |
| <i>E. coli</i>               | IDRL-12165 | <i>bla</i> NDM                        | 2    | 4    | 4    |
| <i>E. coli</i>               | IDRL-12167 | <i>bla</i> NDM                        | 8    | 16   | 16   |
| <i>E. coli</i>               | IDRL-12168 | <i>bla</i> NDM                        | 2    | 8    | 4    |
| <i>Klebsiella pneumoniae</i> | IDRL-10358 | <i>bla</i> KPC                        | 2    | 16   | 16   |
| <i>K. pneumoniae</i>         | IDRL-10368 | <i>bla</i> KPC                        | 4    | 16   | 8    |
| <i>K. pneumoniae</i>         | IDRL-10370 | <i>bla</i> KPC                        | 4    | 16   | 8    |
| <i>K. pneumoniae</i>         | IDRL-10371 | <i>bla</i> KPC                        | 4    | 16   | 8    |
| <i>K. pneumoniae</i>         | IDRL-10372 | <i>bla</i> KPC                        | 2    | 8    | 4    |
| <i>K. pneumoniae</i>         | IDRL-10373 | <i>bla</i> KPC                        | 0.06 | 0.06 | 0.03 |
| <i>K. pneumoniae</i>         | IDRL-10374 | <i>bla</i> KPC                        | 2    | 4    | 2    |
| <i>K. pneumoniae</i>         | IDRL-10376 | <i>bla</i> KPC                        | 4    | 16   | 8    |
| <i>K. pneumoniae</i>         | IDRL-10377 | <i>bla</i> KPC                        | 4    | 32   | 32   |
| <i>K. pneumoniae</i>         | IDRL-10378 | <i>bla</i> KPC                        | 4    | 32   | 32   |
| <i>K. pneumoniae</i>         | IDRL-10379 | <i>bla</i> KPC                        | 2    | 16   | 8    |
| <i>K. pneumoniae</i>         | IDRL-10380 | <i>bla</i> KPC                        | 2    | 8    | 16   |
| <i>K. pneumoniae</i>         | IDRL-10381 | <i>bla</i> KPC                        | 2    | 4    | 8    |
| <i>K. pneumoniae</i>         | IDRL-10382 | <i>bla</i> KPC                        | 4    | 16   | 8    |
| <i>K. pneumoniae</i>         | IDRL-10383 | <i>bla</i> KPC                        | 2    | 4    | 4    |
| <i>K. pneumoniae</i>         | IDRL-10384 | <i>bla</i> KPC                        | 4    | 16   | 8    |
| <i>K. pneumoniae</i>         | IDRL-10385 | <i>bla</i> KPC                        | 4    | 16   | 8    |
| <i>K. pneumoniae</i>         | IDRL-10386 | <i>bla</i> KPC                        | 2    | 8    | 4    |
| <i>K. pneumoniae</i>         | IDRL-10387 | <i>bla</i> KPC                        | 0.12 | 0.25 | 0.12 |
| <i>K. pneumoniae</i>         | IDRL-10388 | <i>bla</i> KPC                        | 0.12 | 0.03 | 0.12 |
| <i>K. pneumoniae</i>         | IDRL-10390 | <i>bla</i> KPC                        | 4    | 16   | 8    |
| <i>K. pneumoniae</i>         | IDRL-10391 | <i>bla</i> KPC                        | 1    | 2    | 1    |
| <i>K. pneumoniae</i>         | IDRL-10394 | <i>bla</i> KPC                        | 2    | 4    | 4    |
| <i>K. pneumoniae</i>         | IDRL-10395 | <i>bla</i> KPC                        | 4    | 16   | 16   |
| <i>K. pneumoniae</i>         | IDRL-10396 | <i>bla</i> KPC                        | 2    | 16   | 8    |
| <i>K. pneumoniae</i>         | IDRL-10397 | <i>bla</i> KPC                        | 0.03 | 0.06 | 0.06 |
| <i>K. pneumoniae</i>         | IDRL-10398 | <i>bla</i> KPC                        | 0.12 | 0.25 | 0.5  |
| <i>K. pneumoniae</i>         | IDRL-10400 | <i>bla</i> KPC                        | 4    | 8    | 8    |
| <i>K. pneumoniae</i>         | IDRL-10401 | <i>bla</i> KPC                        | 2    | 4    | 4    |
| <i>K. pneumoniae</i>         | IDRL-10408 | <i>bla</i> NDM                        | 8    | 64   | 32   |
| <i>K. pneumoniae</i> complex | IDRL-10409 | <i>bla</i> NDM                        | >64  | >64  | >64  |
| <i>K. pneumoniae</i>         | IDRL-10413 | <i>bla</i> CTX-M-12                   | 0.25 | 1    | 0.5  |
| <i>K. pneumoniae</i>         | IDRL-10415 | <i>bla</i> SHV-43                     | 0.06 | 0.06 | 0.06 |
| <i>K. pneumoniae</i>         | IDRL-10416 | <i>bla</i> TEM-1, <i>bla</i> SHV-43   | 4    | 16   | 8    |
| <i>K. pneumoniae</i>         | IDRL-10417 | <i>bla</i> TEM-10, TEM-1              | 1    | 4    | 2    |
| <i>K. pneumoniae</i>         | IDRL-10422 | <i>bla</i> TEM-9                      | 1    | 1    | 0.5  |
| <i>K. pneumoniae</i>         | IDRL-10425 | <i>bla</i> CTX-M-2, <i>bla</i> SHV-11 | 0.06 | 0.12 | 0.12 |
| <i>K. pneumoniae</i>         | IDRL-10427 | <i>bla</i> TEM-10                     | 0.5  | 0.25 | 0.5  |
| <i>K. pneumoniae</i>         | IDRL-10434 | <i>bla</i> CTX-M-15, <i>bla</i> OXA-1 | 4    | 16   | 16   |
| <i>K. pneumoniae</i>         | IDRL-10437 | <i>bla</i> CTX-M-15, <i>bla</i> SHV-1 | 2    | 8    | 4    |
| <i>K. pneumoniae</i> complex | IDRL-10443 | <i>bla</i> OXA-48                     | 0.25 | 0.12 | 0.25 |
| <i>K. pneumoniae</i> complex | IDRL-10444 | <i>bla</i> OXA-48                     | 0.5  | 0.25 | 0.5  |
| <i>K. pneumoniae</i>         | IDRL-10445 | <i>bla</i> IMP-1                      | 1    | 2    | 2    |
| <i>K. pneumoniae</i>         | IDRL-10446 | <i>bla</i> IMP-1                      | 0.25 | 0.25 | 0.25 |
| <i>K. pneumoniae</i>         | IDRL-10448 | <i>bla</i> NDM-1                      | 8    | 64   | 32   |
| <i>K. pneumoniae</i>         | IDRL-10449 | <i>bla</i> IMP-1                      | 0.5  | 1    | 0.5  |
| <i>K. pneumoniae</i>         | IDRL-10450 | <i>bla</i> IMP-4                      | 1    | 2    | 1    |
| <i>K. pneumoniae</i>         | IDRL-10451 | <i>bla</i> NDM-1                      | 4    | 16   | 16   |
| <i>K. pneumoniae</i>         | IDRL-10453 | <i>bla</i> NDM-1                      | 1    | 2    | 1    |
| <i>K. pneumoniae</i>         | IDRL-10454 | <i>bla</i> NDM-1                      | 1    | 4    | 2    |
| <i>K. pneumoniae</i>         | IDRL-10457 | <i>bla</i> NDM-1                      | 2    | 4    | 2    |
| <i>K. pneumoniae</i>         | IDRL-10460 | <i>bla</i> IMP-1                      | 4    | 4    | 8    |
| <i>K. pneumoniae</i>         | IDRL-10464 | <i>bla</i> OXA-181                    | 8    | 64   | 32   |
| <i>K. pneumoniae</i>         | IDRL-10465 | <i>bla</i> NDM-1                      | 4    | 32   | 32   |
| <i>K. pneumoniae</i>         | IDRL-10468 | <i>bla</i> NDM-1                      | 1    | 4    | 2    |
| <i>K. pneumoniae</i>         | IDRL-10471 | <i>bla</i> NDM-1                      | 1    | 2    | 1    |
| <i>K. pneumoniae</i>         | IDRL-10475 | <i>bla</i> OXA-48                     | 4    | 8    | 8    |
| <i>K. pneumoniae</i>         | IDRL-10478 | <i>bla</i> OXA-232                    | 1    | 1    | 0.5  |
| <i>K. pneumoniae</i>         | IDRL-10479 | <i>bla</i> OXA-48                     | 0.25 | 0.12 | 0.25 |
| <i>K. pneumoniae</i>         | IDRL-10480 | <i>bla</i> OXA-232                    | 0.5  | 1    | 1    |
| <i>K. pneumoniae</i>         | IDRL-10481 | <i>bla</i> OXA-48                     | 0.5  | 0.5  | 0.5  |
| <i>K. pneumoniae</i>         | IDRL-10486 | <i>bla</i> NDM                        | 2    | 4    | 4    |
| <i>K. pneumoniae</i>         | IDRL-10488 | <i>bla</i> NDM                        | 1    | 2    | 1    |
| <i>K. pneumoniae</i>         | IDRL-10490 | <i>bla</i> NDM                        | 8    | 64   | 32   |
| <i>K. pneumoniae</i>         | IDRL-10491 | <i>bla</i> OXA-48                     | 0.12 | 0.06 | 0.12 |
| <i>K. pneumoniae</i>         | IDRL-10492 | <i>bla</i> OXA-48                     | 0.25 | 0.06 | 0.12 |
| <i>K. pneumoniae</i>         | IDRL-10494 | <i>bla</i> OXA-48                     | 1    | 1    | 0.5  |
| <i>K. pneumoniae</i>         | IDRL-10499 | <i>bla</i> KPC                        | 4    | 8    | 8    |
| <i>K. pneumoniae</i>         | IDRL-10500 | <i>bla</i> KPC                        | 2    | 4    | 4    |
| <i>K. pneumoniae</i>         | IDRL-10501 | <i>bla</i> KPC                        | 4    | 16   | 16   |
| <i>K. pneumoniae</i>         | IDRL-10504 | <i>bla</i> KPC                        | 4    | 16   | 16   |
| <i>K. pneumoniae</i>         | IDRL-10505 | <i>bla</i> KPC                        | 4    | 16   | 16   |
| <i>K. pneumoniae</i>         | IDRL-10506 | <i>bla</i> NDM                        | 2    | 2    | 2    |
| <i>K. pneumoniae</i>         | IDRL-10507 | <i>bla</i> KPC                        | 4    | 16   | 16   |
| <i>K. pneumoniae</i>         | IDRL-10508 | <i>bla</i> KPC                        | 1    | 2    | 1    |
| <i>K. pneumoniae</i>         | IDRL-10509 | <i>bla</i> KPC                        | 1    | 1    | 0.5  |
| <i>K. pneumoniae</i>         | IDRL-10510 | <i>bla</i> KPC                        | 2    | 4    | 4    |
| <i>K. pneumoniae</i>         | IDRL-10511 | <i>bla</i> KPC                        | 4    | 16   | 16   |
| <i>K. pneumoniae</i>         | IDRL-10512 | <i>bla</i> KPC                        | 0.5  | 0.5  | 0.5  |
| <i>K. pneumoniae</i>         | IDRL-10513 | <i>bla</i> KPC                        | 0.5  | 0.5  | 0.5  |
| <i>K. pneumoniae</i>         | IDRL-10514 | <i>bla</i> NDM                        | 1    | 2    | 1    |
| <i>K. pneumoniae</i>         | IDRL-10515 | <i>bla</i> KPC                        | 1    | 1    | 0.5  |
| <i>K. pneumoniae</i>         | IDRL-10523 | <i>bla</i> KPC                        | 2    | 8    | 4    |
| <i>K. pneumoniae</i>         | IDRL-10524 | <i>bla</i> KPC                        | 0.5  | 0.5  | 0.5  |
| <i>K. pneumoniae</i>         | IDRL-10526 | <i>bla</i> KPC                        | 4    | 8    | 8    |
| <i>K. pneumoniae</i>         | IDRL-10527 | <i>bla</i> KPC                        | 4    | 16   | 16   |
| <i>K. pneumoniae</i>         | IDRL-10528 | <i>bla</i> KPC                        | 4    | 16   | 16   |
| <i>K. pneumoniae</i>         | IDRL-10529 | <i>bla</i> KPC                        | 1    | 1    | 0.5  |
| <i>K. pneumoniae</i>         | IDRL-10532 | <i>bla</i> KPC                        | 8    | 8    | 32   |
| <i>K. pneumoniae</i>         | IDRL-10535 | <i>bla</i> KPC                        | 8    | 32   | 32   |
| <i>K. pneumoniae</i>         | IDRL-10537 | <i>bla</i> KPC                        | 0.5  | 1    | 0.5  |

|                             |              |                                                                                                         |      |       |      |
|-----------------------------|--------------|---------------------------------------------------------------------------------------------------------|------|-------|------|
| <i>K. pneumoniae</i>        | IDRL-10538   | <i>bla<sub>KPC</sub></i>                                                                                | 0.25 | 0.25  | 0.25 |
| <i>K. pneumoniae</i>        | IDRL-10539   | <i>bla<sub>KPC</sub></i>                                                                                | 8    | 32    | 32   |
| <i>K. pneumoniae</i>        | IDRL-10540   | <i>bla<sub>KPC</sub></i>                                                                                | 4    | 16    | 16   |
| <i>K. pneumoniae</i>        | IDRL-10541   | <i>bla<sub>KPC</sub></i>                                                                                | 4    | 16    | 16   |
| <i>K. pneumoniae</i>        | IDRL-10542   | <i>bla<sub>KPC</sub></i>                                                                                | 0.06 | 0.12  | 0.12 |
| <i>K. pneumoniae</i>        | IDRL-10543   | <i>bla<sub>KPC</sub></i>                                                                                | 0.12 | 0.12  | 0.25 |
| <i>K. pneumoniae</i>        | IDRL-10544   | <i>bla<sub>KPC</sub></i>                                                                                | 2    | 8     | 8    |
| <i>K. pneumoniae</i>        | IDRL-10545   | <i>bla<sub>KPC</sub></i>                                                                                | 4    | 16    | 16   |
| <i>K. pneumoniae</i>        | IDRL-10546   | <i>bla<sub>KPC</sub></i>                                                                                | 0.25 | 0.25  | 0.5  |
| <i>K. pneumoniae</i>        | IDRL-10547   | <i>bla<sub>KPC</sub></i>                                                                                | 1    | 1     | 1    |
| <i>K. pneumoniae</i>        | IDRL-10548   | <i>bla<sub>KPC</sub></i>                                                                                | 1    | 1     | 1    |
| <i>K. pneumoniae</i>        | IDRL-10549   | <i>bla<sub>KPC</sub></i>                                                                                | 0.25 | 0.12  | 0.25 |
| <i>K. pneumoniae</i>        | IDRL-10550   | <i>bla<sub>KPC</sub></i>                                                                                | 0.12 | 0.12  | 0.25 |
| <i>K. pneumoniae</i>        | IDRL-10551   | <i>bla<sub>KPC</sub></i>                                                                                | 0.12 | 0.25  | 0.25 |
| <i>K. pneumoniae</i>        | IDRL-10552   | <i>bla<sub>KPC</sub></i>                                                                                | 0.5  | 0.25  | 0.5  |
| <i>K. pneumoniae</i>        | IDRL-10554   | <i>bla<sub>KPC</sub></i>                                                                                | 8    | 32    | 32   |
| <i>K. pneumoniae</i>        | IDRL-10555   | <i>bla<sub>KPC</sub></i>                                                                                | 0.5  | 0.5   | 0.5  |
| <i>K. pneumoniae</i>        | IDRL-10556   | <i>bla<sub>KPC</sub></i>                                                                                | 0.03 | 0.06  | 0.25 |
| <i>K. pneumoniae</i>        | IDRL-10557   | <i>bla<sub>KPC</sub></i>                                                                                | 1    | 2     | 2    |
| <i>K. pneumoniae</i>        | IDRL-10558   | <i>bla<sub>KPC</sub></i>                                                                                | 0.12 | 0.03  | 0.25 |
| <i>K. pneumoniae</i>        | IDRL-10559   | <i>bla<sub>KPC</sub></i>                                                                                | 4    | 16    | 16   |
| <i>K. pneumoniae</i>        | IDRL-10560   | <i>bla<sub>KPC</sub></i>                                                                                | 4    | 4     | 8    |
| <i>K. pneumoniae</i>        | IDRL-10561   | <i>bla<sub>KPC</sub></i>                                                                                | 1    | 1     | 1    |
| <i>K. pneumoniae</i>        | IDRL-10562   | <i>bla<sub>KPC</sub></i>                                                                                | 0.25 | 0.5   | 0.25 |
| <i>K. pneumoniae</i>        | IDRL-10564   | <i>bla<sub>KPC</sub></i>                                                                                | 0.5  | 0.25  | 0.5  |
| <i>K. pneumoniae</i>        | IDRL-10565   | <i>bla<sub>KPC</sub></i>                                                                                | 0.25 | 0.25  | 0.25 |
| <i>K. pneumoniae</i>        | IDRL-10566   | <i>bla<sub>KPC</sub></i>                                                                                | 0.5  | 0.25  | 0.5  |
| <i>K. pneumoniae</i>        | IDRL-10567   | <i>bla<sub>KPC</sub></i>                                                                                | 0.25 | 0.25  | 0.25 |
| <i>K. pneumoniae</i>        | IDRL-10568   | <i>bla<sub>KPC</sub></i>                                                                                | 2    | 2     | 2    |
| <i>K. pneumoniae</i>        | IDRL-10569   | <i>bla<sub>KPC</sub></i>                                                                                | 4    | 16    | 16   |
| <i>K. pneumoniae</i>        | IDRL-10570   | <i>bla<sub>KPC</sub></i>                                                                                | 1    | 4     | 4    |
| <i>K. pneumoniae</i>        | IDRL-10574   | <i>bla<sub>NDM</sub></i>                                                                                | 8    | 64    | 32   |
| <i>K. pneumoniae</i>        | IDRL-10575   | <i>bla<sub>KPC</sub></i>                                                                                | 0.25 | 0.25  | 1    |
| <i>K. pneumoniae</i>        | IDRL-10577   | <i>bla<sub>KPC</sub></i>                                                                                | 4    | 16    | 16   |
| <i>K. pneumoniae</i>        | IDRL-10578   | <i>bla<sub>KPC</sub></i>                                                                                | 0.12 | 0.25  | 0.12 |
| <i>K. pneumoniae</i>        | IDRL-10589   | <i>bla<sub>TEM</sub>, bla<sub>SHV</sub>-12</i>                                                          | >64  | >64   | >64  |
| <i>K. pneumoniae</i>        | IDRL-10599   | <i>bla<sub>TEM</sub>-26, bla<sub>SHV</sub>-1</i>                                                        | 4    | 32    | 32   |
| <i>K. pneumoniae</i>        | IDRL-10600   | <i>bla<sub>TEM</sub>-1, bla<sub>SHV</sub></i>                                                           | 2    | 4     | 4    |
| <i>K. pneumoniae</i>        | IDRL-10601   | <i>bla<sub>SHV</sub>-5/55</i>                                                                           | 1    | 1     | 1    |
| <i>K. pneumoniae</i>        | IDRL-10602   | <i>bla<sub>SHV</sub>-5/55</i>                                                                           | 1    | 1     | 1    |
| <i>K. pneumoniae</i>        | IDRL-10626   | <i>bla<sub>SHV</sub>-12</i>                                                                             | 1    | 2     | 2    |
| <i>K. pneumoniae</i>        | IDRL-10639   | <i>bla<sub>CTX</sub>-M-1, bla<sub>SHV</sub>-1</i>                                                       | 0.5  | 0.5   | 1    |
| <i>K. pneumoniae</i>        | IDRL-10647   | <i>bla<sub>CTX</sub>-M-2, bla<sub>TEM</sub>-1, bla<sub>SHV</sub>-11</i>                                 | 1    | 0.5   | 0.5  |
| <i>K. pneumoniae</i>        | IDRL-10648   | <i>bla<sub>SHV</sub>-1</i>                                                                              | 8    | 64    | 32   |
| <i>K. pneumoniae</i>        | IDRL-10652   | <i>bla<sub>TEM</sub>-26, bla<sub>SHV</sub>-1</i>                                                        | 1    | 1     | 2    |
| <i>K. pneumoniae</i>        | IDRL-10656   | <i>bla<sub>TEM</sub>-1, bla<sub>SHV</sub>-12</i>                                                        | 4    | 8     | 8    |
| <i>K. pneumoniae</i>        | IDRL-10660   | <i>bla<sub>TEM</sub>, bla<sub>SHV</sub>-2</i>                                                           | 1    | 2     | 2    |
| <i>K. pneumoniae</i>        | IDRL-10661   | <i>bla<sub>TEM</sub>-26</i>                                                                             | 1    | 2     | 2    |
| <i>K. pneumoniae</i>        | IDRL-10662   | <i>bla<sub>TEM</sub>-1, bla<sub>SHV</sub></i>                                                           | 4    | 16    | 16   |
| <i>K. pneumoniae</i>        | IDRL-10663   | <i>bla<sub>SHV</sub>-11</i>                                                                             | 1    | 4     | 4    |
| <i>K. pneumoniae</i>        | IDRL-10664   | <i>bla<sub>TEM</sub>-6, bla<sub>SHV</sub>-1</i>                                                         | 0.5  | 0.5   | 1    |
| <i>K. pneumoniae</i>        | IDRL-10666   | <i>bla<sub>TEM</sub>-10, bla<sub>SHV</sub></i>                                                          | 4    | 16    | 16   |
| <i>K. pneumoniae</i>        | IDRL-10667   | <i>bla<sub>TEM</sub>-1, bla<sub>SHV</sub>-5/55, bla<sub>CTX</sub>-M-1</i>                               | 4    | 16    | 16   |
| <i>K. pneumoniae</i>        | IDRL-11412   | <i>bla<sub>OXA</sub>-48</i>                                                                             | 0.06 | 0.015 | 0.06 |
| <i>K. pneumoniae</i>        | IDRL-12147   | <i>bla<sub>OXA</sub>-48</i>                                                                             | 0.5  | 0.12  | 0.5  |
| <i>K. pneumoniae</i>        | IDRL-12148   | <i>bla<sub>OXA</sub>-48</i>                                                                             | >64  | >64   | >64  |
| <i>K. pneumoniae</i>        | IDRL-12151   | <i>bla<sub>OXA</sub>-48</i>                                                                             | 1    | 2     | 2    |
| <i>K. pneumoniae</i>        | IDRL-12160   | <i>bla<sub>NDM</sub></i>                                                                                | 2    | 1     | 2    |
| <i>K. pneumoniae</i>        | IDRL-12163   | <i>bla<sub>NDM</sub></i>                                                                                | 2    | 4     | 4    |
| <i>K. pneumoniae</i>        | IDRL-12166   | <i>bla<sub>NDM</sub></i>                                                                                | 1    | 1     | 1    |
| <i>K. pneumoniae</i>        | IDRL-12169   | <i>bla<sub>KPC</sub></i>                                                                                | 0.5  | 0.25  | 0.5  |
| <i>K. pneumoniae</i>        | IDRL-12171   | <i>bla<sub>KPC</sub></i>                                                                                | 2    | 8     | 8    |
| <i>K. pneumoniae</i>        | IDRL-12172   | <i>bla<sub>KPC</sub></i>                                                                                | 0.25 | 0.5   | 0.25 |
| <i>K. pneumoniae</i>        | IDRL-12174   | <i>bla<sub>KPC</sub></i>                                                                                | 4    | 16    | 16   |
| <i>K. pneumoniae</i>        | IHMA-1142926 | <i>bla<sub>SHV</sub>-OSBL, bla<sub>TEM</sub>-OSBL, bla<sub>CTX</sub>-M-1 GROUP</i>                      | 4    | 16    | 32   |
| <i>K. pneumoniae</i>        | IHMA-1211353 | <i>bla<sub>SHV</sub>-OSBL, bla<sub>TEM</sub>-OSBL, bla<sub>CTX</sub>-M-15, bla<sub>KPC</sub>-2</i>      | 4    | 16    | 8    |
| <i>K. pneumoniae</i>        | IHMA-1246905 | <i>bla<sub>SHV</sub>-OSBL, bla<sub>TEM</sub>-OSBL, bla<sub>CTX</sub>-M-1 GROUP, bla<sub>NDM</sub>-1</i> | 8    | 32    | 32   |
| <i>K. pneumoniae</i>        | IHMA-1247970 | <i>bla<sub>SHV</sub>-OSBL, bla<sub>TEM</sub>-OSBL, bla<sub>CTX</sub>-M-1 GROUP, bla<sub>NDM</sub>-1</i> | 8    | 32    | 32   |
| <i>K. pneumoniae</i>        | IHMA-1261283 | <i>bla<sub>SHV</sub>-OSBL, bla<sub>TEM</sub>-OSBL, bla<sub>KPC</sub>-3</i>                              | 4    | 16    | 16   |
| <i>K. pneumoniae</i>        | IHMA-1269211 | <i>bla<sub>SHV</sub>-OSBL, bla<sub>TEM</sub>-OSBL</i>                                                   | 16   | 32    | 32   |
| <i>K. pneumoniae</i>        | IHMA-1273401 | <i>bla<sub>SHV</sub>-12, bla<sub>KPC</sub>-2</i>                                                        | 8    | 32    | 32   |
| <i>K. pneumoniae</i>        | IHMA-1294760 | <i>bla<sub>SHV</sub>-12, bla<sub>TEM</sub>-OSBL, bla<sub>KPC</sub>-2</i>                                | 4    | 8     | 8    |
| <i>K. pneumoniae</i>        | IHMA-1296510 | <i>bla<sub>SHV</sub>-12, bla<sub>TEM</sub>-OSBL, bla<sub>KPC</sub>-3</i>                                | 8    | 8     | 32   |
| <i>K. pneumoniae</i>        | IHMA-1319427 | <i>bla<sub>SHV</sub>-12, bla<sub>TEM</sub>-OSBL</i>                                                     | 32   | 32    | 64   |
| <i>K. pneumoniae</i>        | IHMA-1369251 | <i>bla<sub>SHV</sub>-12, bla<sub>TEM</sub>-OSBL, bla<sub>NDM</sub>-6</i>                                | 8    | 16    | 32   |
| <i>Enterobacter cloacae</i> | IDRL-10375   | <i>bla<sub>KPC</sub></i>                                                                                | 0.5  | 0.5   | 0.25 |
| <i>E. cloacae</i>           | IDRL-10392   | <i>bla<sub>KPC</sub></i>                                                                                | 0.25 | 0.25  | 0.25 |
| <i>E. cloacae</i>           | IDRL-10399   | <i>bla<sub>KPC</sub></i>                                                                                | 0.5  | 0.25  | 0.25 |
| <i>E. cloacae</i>           | IDRL-10403   | <i>bla<sub>KPC</sub></i>                                                                                | 2    | 2     | 4    |
| <i>E. cloacae</i>           | IDRL-10405   | <i>bla<sub>KPC</sub></i>                                                                                | 8    | 16    | 4    |
| <i>E. cloacae</i>           | IDRL-10459   | <i>bla<sub>IMP</sub>-1</i>                                                                              | 2    | 2     | 2    |
| <i>E. cloacae</i>           | IDRL-10461   | <i>bla<sub>IMP</sub>-1</i>                                                                              | 16   | 32    | 32   |
| <i>E. cloacae</i>           | IDRL-10462   | <i>bla<sub>NDM</sub>-1</i>                                                                              | 4    | 8     | 8    |
| <i>E. cloacae</i>           | IDRL-10463   | <i>bla<sub>NDM</sub>-1</i>                                                                              | 8    | 64    | 16   |
| <i>E. cloacae</i>           | IDRL-10470   | <i>bla<sub>NDM</sub>-1</i>                                                                              | 1    | 1     | 4    |
| <i>E. cloacae</i>           | IDRL-10474   | <i>bla<sub>NDM</sub>-1</i>                                                                              | 4    | 8     | 8    |
| <i>E. cloacae</i>           | IDRL-10476   | <i>bla<sub>IMI</sub>-1</i>                                                                              | 1    | 2     | 2    |
| <i>E. cloacae</i>           | IDRL-10477   | <i>bla<sub>IMI</sub>-1</i>                                                                              | 0.5  | 0.5   | 0.06 |
| <i>E. cloacae</i> complex   | IDRL-10484   | <i>bla<sub>IMP</sub></i>                                                                                | 16   | 32    | 32   |
| <i>E. cloacae</i> complex   | IDRL-10485   | <i>bla<sub>IMP</sub></i>                                                                                | 2    | 8     | 2    |
| <i>E. cloacae</i> complex   | IDRL-10487   | <i>bla<sub>NDM</sub></i>                                                                                | 2    | 4     | 2    |
| <i>E. cloacae</i> complex   | IDRL-10496   | <i>bla<sub>IMI</sub></i>                                                                                | 1    | 1     | 1    |
| <i>E. cloacae</i> complex   | IDRL-10497   | <i>bla<sub>IMI</sub>-1</i>                                                                              | 0.5  | 1     | 1    |
| <i>E. cloacae</i> complex   | IDRL-10498   | <i>bla<sub>IMI</sub>-1</i>                                                                              | 0.5  | 1     | 1    |
| <i>E. cloacae</i>           | IDRL-10517   | <i>bla<sub>KPC</sub></i>                                                                                | 0.25 | 0.5   | 2    |
| <i>E. cloacae</i> complex   | IDRL-10631   | <i>bla<sub>CTX</sub>-M-9</i>                                                                            | 0.25 | 0.12  | 0.06 |

|                               |              |                                                                                                                                                               |       |       |      |
|-------------------------------|--------------|---------------------------------------------------------------------------------------------------------------------------------------------------------------|-------|-------|------|
| <i>E. cloacae</i>             | IHMA-1100868 | <i>bla</i> <sub>TEM</sub> -OSBL; <i>bla</i> <sub>CTX-M-15</sub> ; <i>bla</i> <sub>KPC-2</sub>                                                                 | 32    | 64    | 64   |
| <i>E. cloacae</i>             | IHMA-1114332 | <i>bla</i> <sub>NDM-7</sub>                                                                                                                                   | 32    | >64   | 16   |
| <i>E. cloacae</i>             | IHMA-1178662 | <i>bla</i> <sub>TEM</sub> -OSBL; <i>bla</i> <sub>CTX-M-15</sub> ; <i>bla</i> <sub>ACT-TYPE</sub> ; <i>bla</i> <sub>NDM-1</sub>                                | 2     | 2     | 4    |
| <i>E. cloacae</i>             | IHMA-1207294 | <i>bla</i> <sub>SHV-12</sub> ; <i>bla</i> <sub>TEM</sub> -OSBL; <i>bla</i> <sub>CTX-M-15</sub> ; <i>bla</i> <sub>ACT-TYPE</sub> ; <i>bla</i> <sub>NDM-1</sub> | 8     | 16    | 32   |
| <i>E. cloacae</i>             | IHMA-1207298 | <i>bla</i> <sub>SHV-12</sub> ; <i>bla</i> <sub>TEM</sub> -OSBL; <i>bla</i> <sub>CTX-M-15</sub> ; <i>bla</i> <sub>ACT-TYPE</sub> ; <i>bla</i> <sub>NDM-1</sub> | 8     | 16    | 8    |
| <i>E. cloacae</i>             | IHMA-1207309 | <i>bla</i> <sub>SHV-12</sub> ; <i>bla</i> <sub>TEM</sub> -OSBL; <i>bla</i> <sub>CTX-M-15</sub> ; <i>bla</i> <sub>ACT-TYPE</sub> ; <i>bla</i> <sub>NDM-1</sub> | 8     | 8     | 16   |
| <i>E. cloacae</i>             | IHMA-1207332 | <i>bla</i> <sub>SHV-12</sub> ; <i>bla</i> <sub>TEM</sub> -OSBL; <i>bla</i> <sub>CTX-M-15</sub> ; <i>bla</i> <sub>ACT-TYPE</sub> ; <i>bla</i> <sub>NDM-1</sub> | 4     | 4     | 8    |
| <i>E. cloacae</i>             | IHMA-1207515 | <i>bla</i> <sub>SHV-12</sub> ; <i>bla</i> <sub>TEM</sub> -OSBL; <i>bla</i> <sub>CTX-M-15</sub> ; <i>bla</i> <sub>ACT-TYPE</sub> ; NDM-6                       | 8     | 32    | 32   |
| <i>E. cloacae</i>             | IHMA-1212160 | <i>bla</i> <sub>SHV-12</sub> ; CTX-M-9; <i>bla</i> <sub>ACT-TYPE</sub> ; <i>bla</i> <sub>NDM-6</sub>                                                          | 16    | 32    | 32   |
| <i>E. cloacae</i>             | IHMA-1242680 | <i>bla</i> <sub>CTX-M-15</sub> ; <i>bla</i> <sub>ACT-TYPE</sub> ; <i>bla</i> <sub>NDM-1</sub>                                                                 | 8     | 16    | 16   |
| <i>E. cloacae</i>             | IHMA-1249054 | <i>bla</i> <sub>VIM-1</sub>                                                                                                                                   | 2     | 4     | 4    |
| <i>E. cloacae</i>             | IHMA-1270823 | <i>bla</i> <sub>NDM-1</sub>                                                                                                                                   | 32    | 32    | 32   |
| <i>E. cloacae</i>             | IHMA-1277450 | <i>bla</i> <sub>SHV-12</sub> ; <i>bla</i> <sub>NDM-1</sub>                                                                                                    | 8     | 32    | 32   |
| <i>E. cloacae</i>             | IHMA-1277478 | <i>bla</i> <sub>SHV-12</sub> ; <i>bla</i> <sub>NDM-1</sub>                                                                                                    | 8     | 32    | 32   |
| <i>E. cloacae</i>             | IHMA-1324577 | <i>bla</i> <sub>SHV-12</sub> ; <i>bla</i> <sub>TEM</sub> -OSBL; <i>bla</i> <sub>CTX-M-15</sub> ; <i>bla</i> <sub>NDM-1</sub>                                  | 8     | 8     | 16   |
| <i>Klebsiella aerogenes</i>   | IDRL-10369   | <i>bla</i> <sub>KPC</sub>                                                                                                                                     | 4     | 8     | 8    |
| <i>K. aerogenes</i>           | IDRL-10404   | <i>bla</i> <sub>KPC</sub>                                                                                                                                     | 4     | 16    | 16   |
| <i>K. aerogenes</i>           | IDRL-10536   | <i>bla</i> <sub>KPC</sub>                                                                                                                                     | 0.25  | 0.25  | 4    |
| <i>K. aerogenes</i>           | IHMA-1211388 | <i>bla</i> <sub>TEM</sub> -OSBL; <i>bla</i> <sub>KPC-2</sub>                                                                                                  | 8     | 16    | 32   |
| <i>K. aerogenes</i>           | IHMA-1211454 | <i>bla</i> <sub>TEM</sub> -OSBL; <i>bla</i> <sub>KPC-2</sub>                                                                                                  | 8     | 16    | 64   |
| <i>K. aerogenes</i>           | IHMA-1211469 | <i>bla</i> <sub>TEM</sub> -OSBL; <i>bla</i> <sub>KPC-2</sub>                                                                                                  | 8     | 32    | 32   |
| <i>K. aerogenes</i>           | IHMA-1252218 | -                                                                                                                                                             | 4     | 8     | 8    |
| <i>Morganella morganii</i>    | IDRL-10675   | <i>bla</i> <sub>CMY-2</sub>                                                                                                                                   | 0.12  | 0.25  | 0.25 |
| <i>M. morganii</i>            | IDRL-10676   | <i>bla</i> <sub>CMY-2</sub>                                                                                                                                   | 0.12  | 0.25  | 0.25 |
| <i>Serratia marcescens</i>    | IDRL-10393   | <i>bla</i> <sub>KPC</sub>                                                                                                                                     | 64    | 64    | 64   |
| <i>S. marcescens</i>          | IDRL-10410   | <i>bla</i> <sub>SME</sub>                                                                                                                                     | 0.03  | 0.015 | 0.12 |
| <i>S. marcescens</i>          | IDRL-10442   | <i>bla</i> <sub>SME</sub>                                                                                                                                     | 0.12  | 0.03  | 0.06 |
| <i>S. marcescens</i>          | IDRL-10502   | <i>bla</i> <sub>SME</sub>                                                                                                                                     | 0.25  | 1     | 0.25 |
| <i>S. marcescens</i>          | IDRL-10519   | <i>bla</i> <sub>KPC</sub>                                                                                                                                     | 2     | 4     | 8    |
| <i>S. marcescens</i>          | IHMA-1230547 | <i>bla</i> <sub>TEM-10</sub>                                                                                                                                  | 32    | 32    | 64   |
| <i>S. marcescens</i>          | IHMA-1233240 | <i>bla</i> <sub>SHV-12</sub>                                                                                                                                  | 4     | 8     | 16   |
| <i>Citrobacter freundii</i>   | IDRL-10367   | <i>bla</i> <sub>KPC</sub>                                                                                                                                     | 2     | 8     | 4    |
| <i>C. freundii</i>            | IDRL-10472   | <i>bla</i> <sub>IMP-1</sub>                                                                                                                                   | 2     | 4     | 4    |
| <i>C. freundii</i>            | IDRL-10489   | <i>bla</i> <sub>NDM</sub>                                                                                                                                     | 2     | 16    | 8    |
| <i>C. freundii</i>            | IDRL-10518   | <i>bla</i> <sub>KPC</sub>                                                                                                                                     | 0.12  | 0.25  | 0.5  |
| <i>C. freundii</i>            | IDRL-12173   | <i>bla</i> <sub>KPC</sub>                                                                                                                                     | 0.5   | 0.12  | 0.03 |
| <i>C. freundii</i>            | IDRL-12175   | <i>bla</i> <sub>KPC</sub>                                                                                                                                     | 2     | 4     | 1    |
| <i>C. freundii</i>            | IDRL-12177   | <i>bla</i> <sub>KPC</sub>                                                                                                                                     | 1     | 1     | 0.25 |
| <i>C. freundii</i>            | IDRL-12178   | <i>bla</i> <sub>KPC</sub>                                                                                                                                     | 0.25  | 0.12  | 0.06 |
| <i>C. freundii</i>            | IHMA-1107488 | <i>bla</i> <sub>SHV-12</sub> ; <i>bla</i> <sub>CMY-TYPE</sub> ; <i>bla</i> <sub>VIM-1</sub>                                                                   | 4     | 4     | 4    |
| <i>Citrobacter koseri</i>     | IDRL-10428   | <i>bla</i> <sub>KPC</sub>                                                                                                                                     | 8     | 16    | 8    |
| <i>C. koseri</i>              | IDRL-10493   | <i>bla</i> <sub>OXA-48</sub>                                                                                                                                  | 0.25  | 0.25  | 0.5  |
| <i>C. koseri</i>              | IDRL-10533   | <i>bla</i> <sub>KPC</sub>                                                                                                                                     | 1     | 1     | 0.5  |
| <i>C. koseri</i>              | IDRL-12153   | <i>bla</i> <sub>OXA</sub>                                                                                                                                     | 1     | 1     | 0.25 |
| <i>Providencia stuartii</i>   | IDRL-10389   | <i>bla</i> <sub>KPC</sub>                                                                                                                                     | 0.03  | 0.25  | 0.06 |
| <i>P. stuartii</i>            | IDRL-10576   | <i>bla</i> <sub>KPC</sub>                                                                                                                                     | 0.03  | 0.06  | 0.12 |
| <i>Klebsiella oxytoca</i>     | IDRL-12170   | <i>bla</i> <sub>KPC</sub>                                                                                                                                     | 4     | 8     | 8    |
| <i>Proteus mirabilis</i>      | IDRL-10406   | <i>bla</i> <sub>KPC</sub>                                                                                                                                     | 0.015 | 0.06  | 0.25 |
| <i>Citrobacter sedlakii</i>   | IDRL-10473   | <i>bla</i> <sub>NDM-1</sub>                                                                                                                                   | 1     | 2     | 4    |
| <i>Pseudomonas aeruginosa</i> | IDRL-10412   | -                                                                                                                                                             | 1     | 2     | 1    |
| <i>P. aeruginosa</i>          | IDRL-10530   | -                                                                                                                                                             | 0.25  | 0.5   | 1    |
| <i>P. aeruginosa</i>          | IDRL-10534   | -                                                                                                                                                             | 0.5   | 2     | 2    |
| <i>P. aeruginosa</i>          | IDRL-10563   | -                                                                                                                                                             | 0.5   | 1     | 2    |
| <i>P. aeruginosa</i>          | IDRL-10628   | -                                                                                                                                                             | 1     | 2     | 1    |
| <i>P. aeruginosa</i>          | IDRL-11622   | -                                                                                                                                                             | 0.12  | 0.12  | 0.25 |
| <i>P. aeruginosa</i>          | IDRL-11650   | -                                                                                                                                                             | 1     | 2     | 2    |
| <i>P. aeruginosa</i>          | IDRL-11660   | -                                                                                                                                                             | 2     | 8     | 4    |
| <i>P. aeruginosa</i>          | IDRL-11686   | -                                                                                                                                                             | 0.5   | 4     | 4    |
| <i>P. aeruginosa</i>          | IDRL-11688   | -                                                                                                                                                             | 0.5   | 2     | 0.5  |
| <i>P. aeruginosa</i>          | IDRL-11690   | -                                                                                                                                                             | 0.5   | 0.5   | 0.5  |
| <i>P. aeruginosa</i>          | IDRL-11691   | -                                                                                                                                                             | 0.12  | 0.12  | 0.12 |
| <i>P. aeruginosa</i>          | IDRL-11696   | -                                                                                                                                                             | 0.5   | 0.5   | 1    |
| <i>P. aeruginosa</i>          | IDRL-11699   | -                                                                                                                                                             | 1     | 2     | 1    |
| <i>P. aeruginosa</i>          | IDRL-11701   | -                                                                                                                                                             | 0.25  | 0.5   | 2    |
| <i>P. aeruginosa</i>          | IDRL-11704   | -                                                                                                                                                             | 0.5   | 2     | 1    |
| <i>P. aeruginosa</i>          | IDRL-11706   | -                                                                                                                                                             | 1     | 2     | 1    |
| <i>P. aeruginosa</i>          | IDRL-11707   | -                                                                                                                                                             | 1     | 2     | 2    |
| <i>P. aeruginosa</i>          | IDRL-11720   | -                                                                                                                                                             | 0.06  | 0.12  | 0.5  |
| <i>P. aeruginosa</i>          | IDRL-11723   | -                                                                                                                                                             | 0.5   | 1     | 1    |
| <i>P. aeruginosa</i>          | IDRL-11736   | -                                                                                                                                                             | 0.25  | 0.5   | 1    |
| <i>P. aeruginosa</i>          | IDRL-11737   | -                                                                                                                                                             | 0.12  | 0.25  | 0.5  |
| <i>P. aeruginosa</i>          | IDRL-11738   | -                                                                                                                                                             | 0.25  | 1     | 2    |
| <i>P. aeruginosa</i>          | IDRL-11739   | -                                                                                                                                                             | 0.25  | 0.5   | 1    |
| <i>P. aeruginosa</i>          | IDRL-11740   | -                                                                                                                                                             | 0.25  | 1     | 0.5  |
| <i>P. aeruginosa</i>          | IDRL-11741   | -                                                                                                                                                             | 0.25  | 0.5   | 1    |
| <i>P. aeruginosa</i>          | IDRL-11742   | -                                                                                                                                                             | 0.5   | 1     | 2    |
| <i>P. aeruginosa</i>          | IDRL-11743   | -                                                                                                                                                             | 2     | 8     | 4    |
| <i>P. aeruginosa</i>          | IDRL-11744   | -                                                                                                                                                             | 0.12  | 0.5   | 0.5  |
| <i>P. aeruginosa</i>          | IDRL-11745   | -                                                                                                                                                             | 0.25  | 2     | 1    |
| <i>P. aeruginosa</i>          | IDRL-11746   | -                                                                                                                                                             | 2     | 4     | 8    |
| <i>P. aeruginosa</i>          | IDRL-11747   | -                                                                                                                                                             | 0.25  | 2     | 1    |
| <i>P. aeruginosa</i>          | IDRL-11748   | -                                                                                                                                                             | 0.25  | 1     | 0.5  |
| <i>P. aeruginosa</i>          | IDRL-11749   | -                                                                                                                                                             | 0.25  | 1     | 1    |
| <i>P. aeruginosa</i>          | IDRL-11750   | -                                                                                                                                                             | 1     | 2     | 4    |
| <i>P. aeruginosa</i>          | IDRL-11751   | -                                                                                                                                                             | 0.25  | 1     | 0.5  |
| <i>P. aeruginosa</i>          | IDRL-11752   | -                                                                                                                                                             | 0.25  | 0.5   | 0.5  |
| <i>P. aeruginosa</i>          | IDRL-11753   | -                                                                                                                                                             | 0.25  | 2     | 2    |
| <i>P. aeruginosa</i>          | IDRL-11754   | -                                                                                                                                                             | 0.5   | 1     | 1    |
| <i>P. aeruginosa</i>          | IDRL-11755   | -                                                                                                                                                             | 0.06  | 0.5   | 0.5  |
| <i>P. aeruginosa</i>          | IDRL-11756   | -                                                                                                                                                             | 0.5   | 2     | 4    |
| <i>P. aeruginosa</i>          | IDRL-11757   | -                                                                                                                                                             | 0.12  | 0.5   | 2    |
| <i>P. aeruginosa</i>          | IDRL-11758   | -                                                                                                                                                             | 0.5   | 4     | 8    |
| <i>P. aeruginosa</i>          | IDRL-11760   | -                                                                                                                                                             | 0.5   | 4     | 8    |
| <i>P. aeruginosa</i>          | IDRL-11761   | -                                                                                                                                                             | 0.5   | 1     | 8    |
| <i>P. aeruginosa</i>          | IDRL-11762   | -                                                                                                                                                             | 0.25  | 1     | 8    |
| <i>P. aeruginosa</i>          | IDRL-11763   | -                                                                                                                                                             | 0.5   | 1     | 2    |

|                                     |              |                                                                 |       |       |      |
|-------------------------------------|--------------|-----------------------------------------------------------------|-------|-------|------|
| <i>P. aeruginosa</i>                | IDRL-11764   | -                                                               | 1     | 2     | 8    |
| <i>P. aeruginosa</i>                | IDRL-11765   | -                                                               | 1     | 2     | 4    |
| <i>P. aeruginosa</i>                | IDRL-11766   | -                                                               | 1     | 4     | 8    |
| <i>P. aeruginosa</i>                | IDRL-11767   | -                                                               | 0.25  | 1     | 2    |
| <i>P. aeruginosa</i>                | IDRL-11768   | -                                                               | 1     | 1     | 8    |
| <i>P. aeruginosa</i>                | IDRL-11769   | -                                                               | 0.008 | 0.015 | 0.06 |
| <i>P. aeruginosa</i>                | IDRL-11789   | -                                                               | 0.25  | 0.5   | 4    |
| <i>P. aeruginosa</i>                | IDRL-12185   | -                                                               | 0.5   | 1     | 2    |
| <i>P. aeruginosa</i>                | IHMA-1205534 | -                                                               | 2     | 2     | 2    |
| <i>P. aeruginosa</i>                | IHMA-1231459 | -                                                               | 16    | 16    | 16   |
| <i>P. aeruginosa</i>                | IHMA-1276161 | <i>bla</i> <sub>PER-1</sub>                                     | 32    | 32    | 32   |
| <i>Stenotrophomonas maltophilia</i> | IDRL-5070    | -                                                               | 0.25  | 0.25  | 1    |
| <i>S. maltophilia</i>               | IDRL-5071    | -                                                               | 0.008 | 0.015 | 0.25 |
| <i>S. maltophilia</i>               | IDRL-5072    | -                                                               | 0.03  | 0.06  | 0.12 |
| <i>S. maltophilia</i>               | IDRL-5073    | -                                                               | 0.06  | 0.06  | 0.25 |
| <i>S. maltophilia</i>               | IDRL-5075    | -                                                               | 0.5   | 1     | 2    |
| <i>S. maltophilia</i>               | IDRL-5076    | -                                                               | 0.03  | 0.03  | 0.12 |
| <i>S. maltophilia</i>               | IDRL-5077    | -                                                               | 0.03  | 0.06  | 0.25 |
| <i>S. maltophilia</i>               | IDRL-5078    | -                                                               | 0.06  | 0.06  | 0.25 |
| <i>S. maltophilia</i>               | IDRL-5079    | -                                                               | 0.06  | 0.06  | 0.06 |
| <i>S. maltophilia</i>               | IDRL-5080    | -                                                               | 0.06  | 0.06  | 0.5  |
| <i>S. maltophilia</i>               | IDRL-5081    | -                                                               | 0.015 | 0.03  | 0.12 |
| <i>S. maltophilia</i>               | IDRL-5082    | -                                                               | 0.004 | 0.008 | 0.12 |
| <i>S. maltophilia</i>               | IDRL-5084    | -                                                               | 0.06  | 0.06  | 0.5  |
| <i>S. maltophilia</i>               | IDRL-5085    | -                                                               | 0.12  | 0.06  | 0.5  |
| <i>S. maltophilia</i>               | IDRL-5086    | -                                                               | 0.015 | 0.03  | 0.06 |
| <i>S. maltophilia</i>               | IDRL-5087    | -                                                               | 0.06  | 0.06  | 1    |
| <i>S. maltophilia</i>               | IDRL-5088    | -                                                               | 0.12  | 0.25  | 1    |
| <i>S. maltophilia</i>               | IDRL-5089    | -                                                               | 0.03  | 0.03  | 0.25 |
| <i>S. maltophilia</i>               | IDRL-5090    | -                                                               | 0.12  | 0.25  | 1    |
| <i>S. maltophilia</i>               | IDRL-5091    | -                                                               | 0.015 | 0.03  | 0.12 |
| <i>S. maltophilia</i>               | IDRL-5092    | -                                                               | 0.06  | 0.12  | 1    |
| <i>S. maltophilia</i>               | IDRL-5093    | -                                                               | 0.015 | 0.03  | 0.25 |
| <i>S. maltophilia</i>               | IDRL-5094    | -                                                               | 0.015 | 0.03  | 0.06 |
| <i>S. maltophilia</i>               | IDRL-5096    | -                                                               | 0.008 | 0.015 | 0.06 |
| <i>S. maltophilia</i>               | IDRL-5097    | -                                                               | 0.015 | 0.015 | 0.12 |
| <i>S. maltophilia</i>               | IDRL-5128    | -                                                               | 0.015 | 0.03  | 0.03 |
| <i>S. maltophilia</i>               | IDRL-5129    | -                                                               | 0.12  | 0.12  | 0.25 |
| <i>S. maltophilia</i>               | IDRL-5131    | -                                                               | 0.03  | 0.12  | 0.03 |
| <i>S. maltophilia</i>               | IDRL-5132    | -                                                               | 0.06  | 0.03  | 0.06 |
| <i>S. maltophilia</i>               | IDRL-5133    | -                                                               | 0.06  | 0.06  | 0.03 |
| <i>S. maltophilia</i>               | IDRL-5134    | -                                                               | 0.12  | 0.06  | 0.25 |
| <i>S. maltophilia</i>               | IDRL-5135    | -                                                               | 0.06  | 0.06  | 0.03 |
| <i>S. maltophilia</i>               | IDRL-5136    | -                                                               | 0.25  | 0.12  | 0.12 |
| <i>S. maltophilia</i>               | IDRL-5137    | -                                                               | 0.25  | 0.25  | 0.12 |
| <i>S. maltophilia</i>               | IDRL-5138    | -                                                               | 0.25  | 0.25  | 0.12 |
| <i>S. maltophilia</i>               | IDRL-5139    | -                                                               | 0.12  | 0.12  | 0.25 |
| <i>S. maltophilia</i>               | IDRL-5142    | -                                                               | 0.015 | 0.015 | 0.12 |
| <i>S. maltophilia</i>               | IDRL-5143    | -                                                               | 0.015 | 0.03  | 0.03 |
| <i>S. maltophilia</i>               | IDRL-5145    | -                                                               | 0.015 | 0.03  | 0.12 |
| <i>S. maltophilia</i>               | IDRL-5146    | -                                                               | 0.06  | 0.06  | 0.03 |
| <i>S. maltophilia</i>               | IDRL-5148    | -                                                               | 0.03  | 0.06  | 0.06 |
| <i>S. maltophilia</i>               | IDRL-5149    | -                                                               | 0.015 | 0.03  | 0.25 |
| <i>S. maltophilia</i>               | IDRL-5150    | -                                                               | 0.12  | 0.25  | 0.25 |
| <i>S. maltophilia</i>               | IDRL-5152    | -                                                               | 0.015 | 0.03  | 0.03 |
| <i>S. maltophilia</i>               | IDRL-5153    | -                                                               | 0.06  | 0.12  | 0.25 |
| <i>S. maltophilia</i>               | IDRL-5154    | -                                                               | 0.015 | 0.03  | 0.06 |
| <i>S. maltophilia</i>               | IDRL-5155    | -                                                               | 0.12  | 0.25  | 0.03 |
| <i>S. maltophilia</i>               | IDRL-5156    | -                                                               | 0.06  | 0.12  | 0.25 |
| <i>S. maltophilia</i>               | IDRL-5157    | -                                                               | 0.015 | 0.03  | 1    |
| <i>S. maltophilia</i>               | IDRL-5158    | -                                                               | 0.03  | 0.12  | 0.5  |
| <i>S. maltophilia</i>               | IDRL-5160    | -                                                               | 0.03  | 0.06  | 0.25 |
| <i>S. maltophilia</i>               | IDRL-5161    | -                                                               | 0.12  | 0.25  | 0.5  |
| <i>S. maltophilia</i>               | IDRL-5162    | -                                                               | 0.25  | 0.5   | 1    |
| <i>S. maltophilia</i>               | IDRL-5163    | -                                                               | 0.25  | 0.5   | 1    |
| <i>S. maltophilia</i>               | IDRL-5164    | -                                                               | 0.06  | 0.25  | 1    |
| <i>S. maltophilia</i>               | IDRL-5165    | -                                                               | 0.015 | 0.03  | 0.12 |
| <i>S. maltophilia</i>               | IDRL-5166    | -                                                               | 0.03  | 0.12  | 1    |
| <i>S. maltophilia</i>               | IDRL-5168    | -                                                               | 0.03  | 0.06  | 0.06 |
| <i>S. maltophilia</i>               | IDRL-5169    | -                                                               | 0.25  | 0.5   | 1    |
| <i>S. maltophilia</i>               | IDRL-5170    | -                                                               | 0.25  | 0.25  | 1    |
| <i>S. maltophilia</i>               | IDRL-5171    | -                                                               | 0.015 | 0.03  | 0.12 |
| <i>S. maltophilia</i>               | IDRL-5172    | -                                                               | 0.12  | 0.12  | 1    |
| <i>S. maltophilia</i>               | IDRL-5173    | -                                                               | 0.25  | 0.25  | 1    |
| <i>S. maltophilia</i>               | IDRL-5174    | -                                                               | 0.25  | 0.5   | 4    |
| <i>S. maltophilia</i>               | IDRL-5175    | -                                                               | 0.06  | 0.06  | 1    |
| <i>S. maltophilia</i>               | IDRL-5226    | -                                                               | 0.25  | 0.5   | 0.5  |
| <i>S. maltophilia</i>               | IDRL-5227    | -                                                               | 0.25  | 1     | 1    |
| <i>S. maltophilia</i>               | IDRL-5228    | -                                                               | 0.06  | 0.12  | 0.5  |
| <i>S. maltophilia</i>               | IDRL-7117    | -                                                               | 0.12  | 0.25  | 0.25 |
| <i>S. maltophilia</i>               | IDRL-7315    | -                                                               | 0.25  | 0.5   | 1    |
| <i>S. maltophilia</i>               | IDRL-8309    | -                                                               | 0.12  | 0.12  | 0.25 |
| <i>Acinetobacter baumannii</i>      | IDRL-9919    | -                                                               | 0.06  | 0.12  | 0.25 |
| <i>A. baumannii</i>                 | IDRL-11626   | -                                                               | 0.12  | 0.25  | 2    |
| <i>A. baumannii</i>                 | IDRL-11629   | -                                                               | 8     | 16    | 16   |
| <i>A. baumannii</i>                 | IDRL-11631   | -                                                               | 0.03  | 0.06  | 1    |
| <i>A. baumannii</i>                 | IDRL-11632   | -                                                               | 0.25  | 0.25  | 2    |
| <i>A. baumannii</i>                 | IDRL-11641   | -                                                               | 0.12  | 0.25  | 2    |
| <i>A. baumannii</i>                 | IHMA-1121211 | <i>bla</i> <sub>PER-1</sub> , <i>bla</i> <sub>OXA-23</sub>      | 64    | 32    | >64  |
| <i>A. baumannii</i>                 | IHMA-1121896 | <i>bla</i> <sub>PER-1</sub> , <i>bla</i> <sub>OXA-72</sub>      | 16    | >64   | >64  |
| <i>A. baumannii</i>                 | IHMA-1121897 | <i>bla</i> <sub>PER-1</sub> , <i>bla</i> <sub>OXA-72</sub>      | 4     | 8     | 64   |
| <i>A. baumannii</i>                 | IHMA-1121900 | <i>bla</i> <sub>PER-1</sub> , <i>bla</i> <sub>OXA-72</sub>      | 8     | 8     | 64   |
| <i>A. baumannii</i>                 | IHMA-1122558 | <i>bla</i> <sub>TEM-OSBL</sub> , <i>bla</i> <sub>PER-1</sub>    | 16    | 32    | 64   |
| <i>A. baumannii</i>                 | IHMA-1215489 | -                                                               | 4     | 4     | 32   |
| <i>A. baumannii</i>                 | IHMA-1247945 | <i>bla</i> <sub>PER-1</sub> , <i>bla</i> <sub>OXA-23-TYPE</sub> | 16    | 32    | 8    |
| <i>A. baumannii</i>                 | IHMA-1264808 | -                                                               | 2     | 2     | 8    |

|                                     |              |                                                                                                |       |       |       |
|-------------------------------------|--------------|------------------------------------------------------------------------------------------------|-------|-------|-------|
| <i>A. baumannii</i>                 | IHMA-1266661 | <i>bla</i> <sub>OXA-24</sub> -TYPE                                                             | 4     | 4     | 16    |
| <i>A. baumannii</i>                 | IHMA-1266738 | <i>bla</i> <sub>PER-1</sub> , <i>bla</i> <sub>OXA-24</sub> -TYPE                               | 32    | 32    | 32    |
| <i>A. baumannii</i>                 | IHMA-1470727 | <i>bla</i> <sub>PER-7</sub> , <i>bla</i> <sub>NDM-1</sub> , <i>bla</i> <sub>OXA-23</sub> -TYPE | 8     | 32    | 64    |
| <i>A. baumannii</i>                 | IHMA-1908951 | -                                                                                              | 0.5   | 1     | 8     |
| <i>A. baumannii</i>                 | IHMA-1916787 | -                                                                                              | >64   | >64   | >64   |
| <i>A. baumannii</i>                 | IHMA-1939212 | -                                                                                              | 0.5   | 1     | 8     |
| <i>A. baumannii</i>                 | IHMA-1939213 | -                                                                                              | 0.03  | 0.25  | 1     |
| <i>A. baumannii</i>                 | IHMA-1939214 | -                                                                                              | 64    | 64    | 16    |
| <i>A. baumannii</i>                 | IHMA-1939215 | -                                                                                              | 0.06  | 0.12  | 2     |
| <i>A. baumannii</i>                 | IHMA-1939216 | -                                                                                              | 0.06  | 0.12  | 2     |
| <i>A. baumannii</i>                 | IHMA-1939218 | -                                                                                              | 0.06  | 0.12  | 0.25  |
| <i>A. baumannii</i>                 | IHMA-1939205 | -                                                                                              | 0.25  | 0.5   | 1     |
| <i>A. baumannii</i>                 | IHMA-1939206 | -                                                                                              | 0.06  | 0.12  | 1     |
| <i>A. baumannii</i>                 | IHMA-1939207 | -                                                                                              | 0.12  | 0.25  | 1     |
| <i>A. baumannii</i>                 | IHMA-1939208 | -                                                                                              | 0.12  | 0.25  | 1     |
| <i>A. baumannii</i>                 | IHMA-1939209 | -                                                                                              | 0.25  | 0.12  | 1     |
| <i>A. baumannii</i>                 | IHMA-1939210 | -                                                                                              | 0.06  | 0.25  | 0.12  |
| <i>A. baumannii</i>                 | IHMA-1939217 | -                                                                                              | 0.25  | 0.5   | 2     |
| <i>A. baumannii</i>                 | IHMA-1939829 | -                                                                                              | 0.12  | 0.25  | 1     |
| <i>A. baumannii</i>                 | IHMA-1939833 | -                                                                                              | 0.12  | 0.5   | 2     |
| <i>A. baumannii</i>                 | IHMA-1939836 | -                                                                                              | 0.12  | 0.25  | 1     |
| <i>A. baumannii</i>                 | IHMA-1939839 | -                                                                                              | 0.06  | 0.12  | 1     |
| <i>A. baumannii</i>                 | IHMA-1557389 | -                                                                                              | 0.06  | 0.12  | 0.25  |
| <i>A. baumannii</i>                 | IHMA-1939837 | -                                                                                              | 0.12  | 0.25  | 0.5   |
| <i>A. baumannii</i>                 | IHMA-1935985 | -                                                                                              | 0.06  | 0.25  | 1     |
| <i>A. baumannii</i>                 | IHMA-1935986 | -                                                                                              | 0.06  | 0.12  | 0.5   |
| <i>A. baumannii</i>                 | IHMA-1935989 | -                                                                                              | 0.12  | 0.25  | 1     |
| <i>A. baumannii</i>                 | IHMA-1935988 | -                                                                                              | 0.03  | 0.06  | 0.12  |
| <i>A. baumannii</i>                 | IHMA-1909814 | -                                                                                              | 16    | 16    | 64    |
| <i>A. baumannii</i>                 | IHMA-1909886 | -                                                                                              | 16    | 16    | 32    |
| <i>A. baumannii</i>                 | IHMA-1721239 | -                                                                                              | >64   | >64   | 32    |
| <i>A. baumannii</i>                 | IHMA-1935592 | -                                                                                              | 0.06  | 0.06  | 1     |
| <i>A. baumannii</i>                 | IHMA-1935593 | -                                                                                              | 0.12  | 0.25  | 1     |
| <i>A. baumannii</i>                 | IHMA-1935594 | -                                                                                              | 0.5   | 0.5   | 4     |
| <i>A. baumannii</i>                 | IHMA-1935595 | -                                                                                              | 0.12  | 0.25  | 2     |
| <i>A. baumannii</i>                 | IHMA-1935596 | -                                                                                              | 0.03  | 0.06  | 0.5   |
| <i>A. baumannii</i>                 | IHMA-1935597 | -                                                                                              | 0.25  | 0.5   | 2     |
| <i>A. baumannii</i>                 | IHMA-1935599 | -                                                                                              | 0.06  | 0.12  | 2     |
| <i>A. baumannii</i>                 | IHMA-1935601 | -                                                                                              | 0.03  | 0.06  | 2     |
| <i>A. baumannii</i>                 | IHMA-1935602 | -                                                                                              | 0.06  | 0.12  | 2     |
| <i>A. baumannii</i>                 | IHMA-1916476 | -                                                                                              | 16    | 32    | 8     |
| <i>A. baumannii</i>                 | IHMA-1932840 | -                                                                                              | 0.03  | 0.06  | 0.5   |
| <i>A. baumannii</i>                 | IHMA-1721345 | -                                                                                              | 8     | 16    | 64    |
| <i>A. baumannii</i>                 | IHMA-1721555 | -                                                                                              | 64    | >64   | 32    |
| <i>A. baumannii</i>                 | IHMA-1721578 | -                                                                                              | 16    | 64    | 16    |
| <i>A. baumannii</i>                 | IHMA-1922835 | -                                                                                              | 16    | 32    | 16    |
| <i>A. baumannii</i>                 | IHMA-1922836 | -                                                                                              | 32    | 64    | 64    |
| <i>A. baumannii</i>                 | IHMA-1922837 | -                                                                                              | 16    | 32    | 16    |
| <i>A. baumannii</i>                 | IHMA-1922839 | -                                                                                              | 32    | 32    | 32    |
| <i>A. baumannii</i>                 | IHMA-1922843 | -                                                                                              | >64   | >64   | 32    |
| <i>A. baumannii</i>                 | IHMA-1922842 | -                                                                                              | 0.06  | 0.25  | 2     |
| <i>A. baumannii</i>                 | IHMA-1721728 | -                                                                                              | 16    | 32    | 16    |
| <i>A. baumannii</i>                 | IHMA-1922871 | -                                                                                              | 16    | 32    | 16    |
| <i>A. baumannii</i>                 | IHMA-1923238 | -                                                                                              | >64   | >64   | 16    |
| <i>A. baumannii</i>                 | IHMA-1923239 | -                                                                                              | 32    | >64   | 64    |
| <i>A. baumannii</i>                 | IHMA-1923309 | -                                                                                              | >64   | >64   | >64   |
| <i>A. baumannii</i>                 | IHMA-1923304 | -                                                                                              | 32    | >64   | >64   |
| <i>A. baumannii</i>                 | IHMA-1923570 | -                                                                                              | 32    | 32    | 32    |
| <i>A. baumannii</i>                 | IHMA-1923636 | -                                                                                              | 32    | 64    | 64    |
| <i>A. baumannii</i>                 | IHMA-1923637 | -                                                                                              | >64   | >64   | >64   |
| <i>A. baumannii</i>                 | IHMA-1923638 | -                                                                                              | 8     | 32    | 16    |
| <i>A. baumannii</i>                 | IHMA-1923034 | -                                                                                              | 8     | 32    | >64   |
| <i>A. baumannii</i>                 | IHMA-1923035 | -                                                                                              | 4     | 4     | 16    |
| <i>A. baumannii</i>                 | IHMA-1923037 | -                                                                                              | 16    | 32    | 16    |
| <i>A. baumannii</i>                 | IHMA-1923038 | -                                                                                              | 8     | 16    | 32    |
| <i>A. baumannii</i>                 | IHMA-1923040 | -                                                                                              | 4     | 8     | 16    |
| <i>A. baumannii</i>                 | IHMA-1923041 | -                                                                                              | 4     | 8     | 32    |
| <i>A. baumannii</i>                 | IHMA-1923429 | -                                                                                              | 32    | 64    | 8     |
| <i>A. baumannii</i>                 | IHMA-1923431 | -                                                                                              | 32    | 64    | 32    |
| <i>A. baumannii</i>                 | IHMA-1923432 | -                                                                                              | 8     | 16    | 16    |
| <i>A. baumannii</i>                 | IHMA-1923270 | -                                                                                              | 4     | 8     | 8     |
| <i>A. baumannii</i>                 | IHMA-1923102 | -                                                                                              | 16    | 16    | 64    |
| <i>A. baumannii</i>                 | IHMA-1721648 | -                                                                                              | 8     | 16    | 16    |
| <i>A. baumannii</i>                 | IHMA-1922937 | -                                                                                              | 8     | 16    | 16    |
| <i>A. baumannii</i>                 | IHMA-1722147 | -                                                                                              | 16    | 32    | 16    |
| <i>A. baumannii</i>                 | IHMA-1944645 | -                                                                                              | 0.03  | 0.06  | 1     |
| <i>A. baumannii</i>                 | IHMA-1944646 | -                                                                                              | 2     | 4     | 8     |
| <i>A. baumannii</i>                 | IHMA-1947724 | -                                                                                              | 0.06  | 0.12  | 0.5   |
| <i>A. baumannii</i>                 | IHMA-1947725 | -                                                                                              | 0.06  | 0.12  | 1     |
| <i>A. baumannii</i>                 | IHMA-1947726 | -                                                                                              | 0.03  | 0.06  | 1     |
| <i>A. baumannii</i>                 | IHMA-1947744 | -                                                                                              | 0.03  | 0.12  | 1     |
| <i>A. baumannii</i>                 | IHMA-1521197 | -                                                                                              | 0.12  | 0.25  | 2     |
| <i>A. baumannii</i>                 | IHMA-1939308 | -                                                                                              | 0.015 | 0.03  | 0.25  |
| <i>Burkholderia cepacia</i> complex | IHMA-1219352 | -                                                                                              | 8     | 16    | 8     |
| <i>B. vietnamiensis</i>             | IDRL-12145   | -                                                                                              | 0.015 | 0.03  | 0.015 |
| <i>B. ambifaria</i>                 | IDRL-12146   | -                                                                                              | 0.015 | 0.03  | 0.03  |
| <i>B. cenocepacia</i>               | IDRL-12186   | -                                                                                              | 1     | 1     | 0.06  |
| <i>B. multivorans</i>               | IDRL-12187   | -                                                                                              | 0.03  | 0.03  | 0.06  |
| <i>B. multivorans</i>               | IDRL-12188   | -                                                                                              | 0.015 | 0.03  | 0.03  |
| <i>B. multivorans</i>               | IDRL-12189   | -                                                                                              | 0.015 | 0.03  | 0.03  |
| <i>B. multivorans</i>               | IDRL-12190   | -                                                                                              | 16    | 32    | 32    |
| <i>B. cenocepacia</i>               | IDRL-12191   | -                                                                                              | 0.008 | 0.03  | 0.03  |
| <i>B. multivorans</i>               | IDRL-12192   | -                                                                                              | 0.008 | 0.015 | 0.03  |
| <i>B. cepacia</i> complex           | IDRL-12194   | -                                                                                              | 0.03  | 0.03  | 0.06  |
| <i>B. cepacia</i> complex           | IDRL-12211   | -                                                                                              | 0.008 | 0.015 | 0.03  |
| <i>B. multivorans</i>               | IDRL-12212   | -                                                                                              | 8     | 16    | 8     |

|                           |            |   |       |       |       |
|---------------------------|------------|---|-------|-------|-------|
| <i>B. cepacia</i> complex | IDRL-12213 | - | 8     | 16    | 8     |
| <i>B. cepacia</i> complex | IDRL-12214 | - | 0.008 | 0.008 | 0.015 |
| <i>B. vietnamiensis</i>   | IDRL-12215 | - | 0.015 | 0.03  | 0.015 |
| <i>B. cenocepacia</i>     | IDRL-12216 | - | 0.03  | 0.03  | 0.06  |
| <i>B. multivorans</i>     | IDRL-12217 | - | 0.03  | 0.03  | 0.03  |
| <i>B. multivorans</i>     | IDRL-12218 | - | 0.015 | 0.015 | 0.03  |
| <i>B. cepacia</i> complex | IDRL-12219 | - | 0.008 | 0.015 | 0.015 |
| <i>B. cepacia</i> complex | IDRL-12220 | - | 0.03  | 0.06  | 0.06  |
| <i>B. multivorans</i>     | IDRL-12221 | - | 0.03  | 0.03  | 0.06  |
| <i>B. vietnamiensis</i>   | IDRL-12222 | - | 0.03  | 0.06  | 0.015 |
| <i>B. multivorans</i>     | IDRL-12223 | - | 0.015 | 0.015 | 0.06  |
| <i>B. cepacia</i> complex | IDRL-12224 | - | 0.008 | 0.015 | 0.015 |
| <i>B. cepacia</i> complex | IDRL-12225 | - | 0.03  | 0.03  | 0.03  |
| <i>B. cepacia</i> complex | IDRL-12226 | - | 0.015 | 0.015 | 0.03  |
| <i>B. cepacia</i> complex | IDRL-12227 | - | 0.06  | 0.12  | 0.06  |
| <i>B. multivorans</i>     | IDRL-12228 | - | 0.03  | 0.03  | 0.06  |
| <i>B. vietnamiensis</i>   | IDRL-12229 | - | 0.25  | 2     | 0.06  |
| <i>B. cenocepacia</i>     | IDRL-12230 | - | 0.5   | 1     | 0.25  |
| <i>B. cenocepacia</i>     | IDRL-12231 | - | 1     | 2     | 2     |
| <i>B. cepacia</i> complex | IDRL-12232 | - | 0.008 | 0.015 | 0.015 |
| <i>B. vietnamiensis</i>   | IDRL-12233 | - | 0.03  | 0.06  | 0.12  |
| <i>B. cepacia</i> complex | IDRL-12234 | - | 0.03  | 0.03  | 0.06  |
| <i>B. multivorans</i>     | IDRL-12235 | - | 0.015 | 0.015 | 0.06  |
| <i>B. cepacia</i> complex | IDRL-12236 | - | 0.06  | 0.06  | 0.06  |
| <i>B. cepacia</i> complex | IDRL-12237 | - | 0.03  | 0.03  | 0.06  |
| <i>B. multivorans</i>     | IDRL-12238 | - | >64   | >64   | 64    |
| <i>B. arboris</i>         | IDRL-12239 | - | 0.06  | 0.06  | 0.06  |
| <i>B. multivorans</i>     | IDRL-12240 | - | 0.015 | 0.03  | 0.06  |
| <i>B. multivorans</i>     | IDRL-12241 | - | 0.06  | 0.06  | 0.06  |
| <i>B. cepacia</i> complex | IDRL-12242 | - | 0.015 | 0.015 | 0.06  |
| <i>B. arboris</i>         | IDRL-12243 | - | 0.03  | 0.06  | 0.06  |
| <i>B. latens</i>          | IDRL-12244 | - | 0.12  | 0.12  | 0.12  |
| <i>B. multivorans</i>     | IDRL-12245 | - | 0.03  | 0.06  | 0.06  |
| <i>B. multivorans</i>     | IDRL-12246 | - | 0.015 | 0.015 | 0.03  |
| <i>B. cepacia</i> complex | IDRL-12247 | - | 0.015 | 0.03  | 0.015 |
| <i>B. cepacia</i> complex | IDRL-12248 | - | 0.008 | 0.015 | 0.25  |

Table S2. MIC for each quality control strain and testing method.

| <i>Pseudomonas aeruginosa</i><br>ATCC 27853 |                            | <i>Escherichia coli</i><br>ATCC 25922 |               |
|---------------------------------------------|----------------------------|---------------------------------------|---------------|
| ID-BMD <sup>1</sup><br>(µg/mL)              | AD <sup>2</sup><br>(µg/mL) | ID-BMD<br>(µg/mL)                     | AD<br>(µg/mL) |
| 0.5                                         | 0.5                        | 0.25                                  | 0.125         |
| 0.25                                        | 2                          | 0.06                                  | 0.125         |
| 0.25                                        | 1                          | 0.25                                  | 0.125         |
| 0.5                                         | 2                          | 0.25                                  | 0.5           |
| 0.5                                         | 1                          | 0.25                                  | 0.5           |
| 0.12                                        | 2                          | 0.25                                  | 0.5           |
| 0.5                                         | 2                          | 0.25                                  | 0.5           |
| 0.5                                         | 2                          | 0.25                                  | 0.25          |
| 0.5                                         | 2                          | 0.25                                  | 0.25          |
| 0.25                                        | 2                          | 0.125                                 | 0.125         |
| 0.25                                        | 2                          | 0.25                                  | 0.25          |
| 0.25                                        | 2                          | 0.25                                  | 0.125         |
| 0.25                                        | 2                          | 0.125                                 | 0.125         |
| 0.5                                         | 2                          | 0.125                                 | 0.06          |
| 0.25                                        | 2                          | 0.25                                  | 0.125         |
| 0.5                                         | 4                          | 0.25                                  | 0.125         |
| 0.125                                       | 2                          | 0.25                                  | 0.5           |
| 0.125                                       | 2                          | 0.25                                  | 0.5           |
| 0.25                                        | 2                          | 0.25                                  | 0.06          |
| 0.25                                        | 0.25                       | 0.125                                 | 0.06          |
| 0.125                                       | 0.5                        | 0.25                                  | 0.06          |
| 0.125                                       | 2                          | 0.125                                 | 0.25          |
| 0.5                                         | 2                          | 0.25                                  | 0.06          |
| 0.25                                        | 2                          | 0.25                                  | 0.125         |
| 0.25                                        | 1                          | 0.5                                   | 0.125         |
| 0.25                                        | 2                          | 0.25                                  | 0.125         |
| 0.25                                        | 2                          | 0.25                                  | 0.06          |
| 0.25                                        | 1                          | 0.25                                  | 0.06          |
| 0.25                                        | 1                          | 0.25                                  | 0.06          |

<sup>1</sup>ID-BMD: iron-depleted broth microdilution

<sup>2</sup>AD: agar dilution



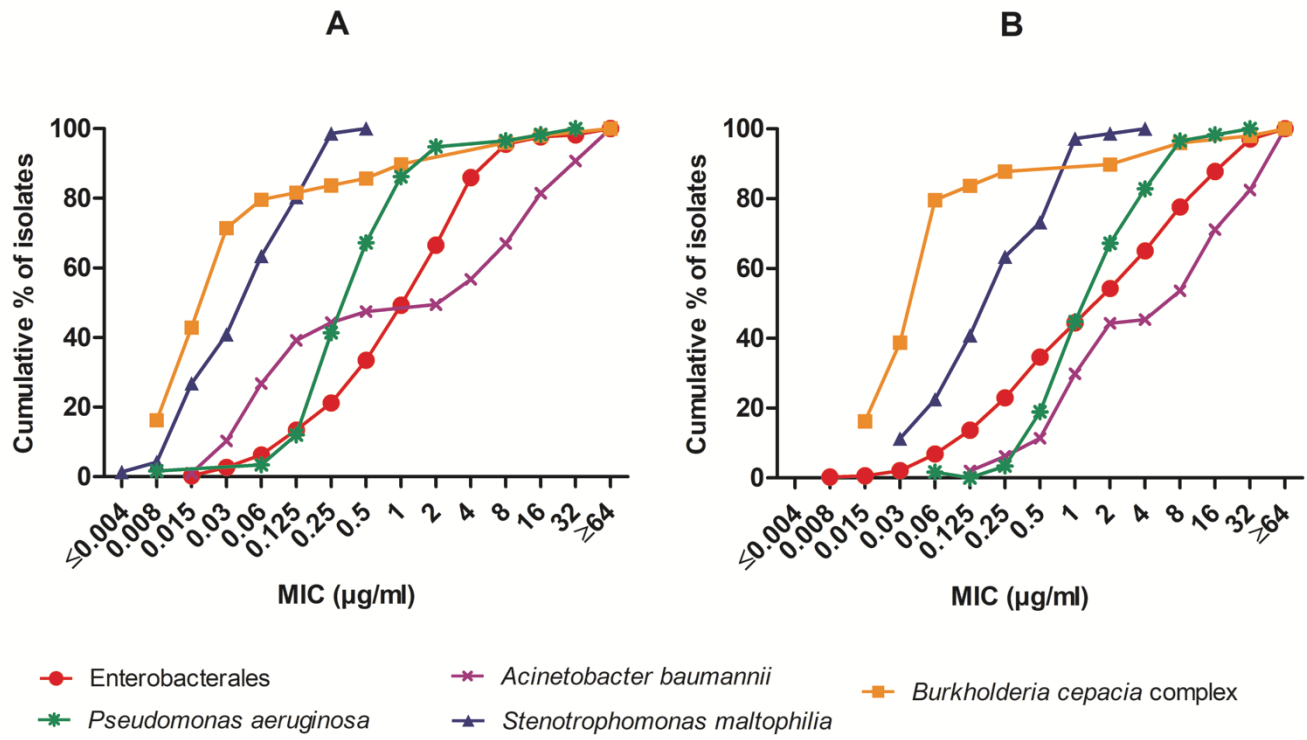

Figure S1. Cumulative percentages of isolates inhibited at specified concentrations in µg/mL for broth microdilution using iron depleted cation-adjusted Muller Hinton broth (ID-BMD) (A), and agar dilution (B).
